# Supplementary material for: Quantitative 1H-NMR spectroscopy as an efficient method for identification and quantification of PVC, ABS and PA microparticles
Source: Royal Society of Chemistry journal article supplement (doi:10.1039/d0an00879f), 2020-01-01
Supplement: d0an00879f1.pdf [file d0an00879f1.pdf]

# 1 Quantitative <sup>1</sup>H-NMR Spectroscopy as an Efficient Method for 2 Identification and Quantification of PVC, ABS and PA Microparticles

3 *Nadine Peez<sup>†</sup>, Wolfgang Imhof<sup>†,\*</sup>*

4 *<sup>†</sup> Institute of Integrated Natural Sciences, University Koblenz - Landau, Universitätsstr. 1, D-  
5 56070 Koblenz, Germany.*

## 6 **Supporting Information:**

- 7 Table SI 1 (2) Possible solvents for PVC, ABS and PA based on the literature. Given are the  
8 solvents already described for NMR spectroscopic investigations of the  
9 respective polymers, the corresponding <sup>1</sup>H-Signals of the polymers and the  
10 residual proton signals in ppm as well as the solvents tested in this survey.
- 11 Figure SI 1 (2) <sup>1</sup>H-NMR spectra of matrix effects of natural aquatic biofilm. **a)** ~11 mg/mL  
12 biofilm solved in CDCl<sub>3</sub>/FA 3:2. **b)** ~16 mg/mL biofilm solved in CDCl<sub>3</sub>. **c)**  
13 ~14 mg/mL biofilm solved in DMSO-d<sub>6</sub>.
- 14 Figure SI 2 (2) <sup>1</sup>H-NMR spectrum of PVC after line fitting for the PF-method in the  
15 range of 3.0-1.5 ppm. Blue represent the individual fitted peaks and  
16 pink represent the sum of the fitted peaks.
- 17 Figure SI 3 (3) <sup>1</sup>H-NMR spectra of ABS in CDCl<sub>3</sub> (left) and in DMSO-d<sub>6</sub> (right) after line  
18 fitting for the PF-method in the range of 8.0-6.0 ppm and 3.0-2.0 ppm. Blue  
19 represent the fitted peaks and pink represent the sum of the fitted peaks. <sup>1</sup>H  
20 NMR spectrum of ABS after line fitting for the PF-method in the  
21 range of 8.0-6.0 ppm. Blue represent the individual fitted peaks and  
22 pink represent the sum of the fitted peaks.
- 23 Figure SI 4 (3) Calibration curves for the signal which can also be used for quantification for  
24 the MP particles of PVC, ABS and PA with the appropriate confidence interval  
25 (CI). Plotted is the MP concentration in mg/mL against the normalized  
26 intensity.
- 27 Table SI 2 (4) Linearity data of MP particles (PVC, ABS and PA). Data were calculated from  
28 five measurement points.
- 29 Table SI 3 (4) Quantitative results for model samples using the signal which can also be used  
30 for quantification for the MP particles of PVC, ABS and PA.
- 31 Table SI 4 (5) Overview of the <sup>1</sup>H-Signals of the MP polymer types, residual solvent signals  
32 and matrix effects of biofilm in the corresponding solvent conditions.

33

34 **Table SI 1.** Possible solvents for PVC, ABS and PA based on the literature. Given are the solvents already  
 35 described for NMR spectroscopic investigations of the respective polymers, the corresponding <sup>1</sup>H-Signals of the  
 36 polymers and the residual proton signals in ppm as well as the solvents tested in this survey.

| MP     | Solvents used in the literature | MP <sup>1</sup> H signals in ppm    | Solvent <sup>1</sup> H signals in ppm | Solvents tested in this survey |
|--------|---------------------------------|-------------------------------------|---------------------------------------|--------------------------------|
| PVC    | DMSO <sup>28</sup>              | 4.7-4.3; 2.4-2.1 <sup>28</sup>      | 2.5                                   | DMSO                           |
|        | CDCl <sub>3</sub> <sup>27</sup> | 4.45; 2.1 <sup>27</sup>             | 7.2                                   |                                |
| ABS    | CDCl <sub>3</sub> <sup>30</sup> | 7.2-6.4; 5.5; 2.5-1.2 <sup>30</sup> | 7.2                                   | CDCl <sub>3</sub>              |
|        | DMSO <sup>29</sup>              | 7.2-6.8; 5.3; 2.5-1.4 <sup>29</sup> | 2.5                                   | DMSO                           |
| PA 6.6 | TFA <sup>31</sup>               | 3.3; 2.5; 1.7; 1.3 <sup>31</sup>    | ~ 12                                  | CDCl <sub>3</sub> /FA 3:2      |
|        | Cresol/ODCB <sup>26</sup>       | not specified <sup>26</sup>         | 7.2; 6.6; 5.0; 2.3                    |                                |

37 TFA, trifluoroacetic acid; FA, formic acid; ODCB, 1,2-dichlorobenzene.

38

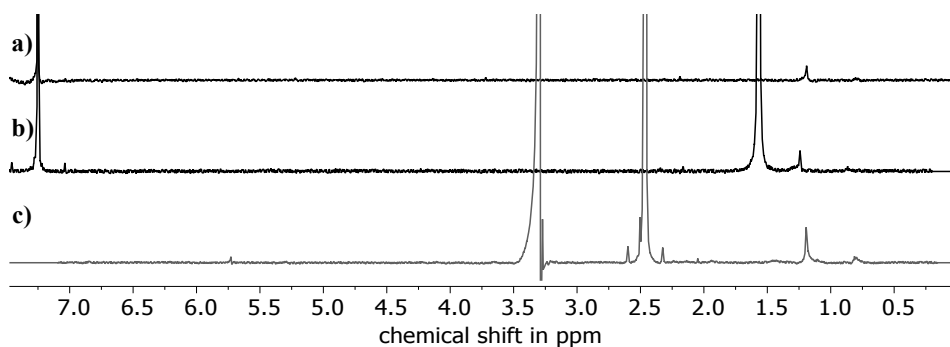

39

40 **Figure SI 1** <sup>1</sup>H-NMR spectra of matrix effects of natural aquatic biofilm in the respective deuterated solvent. **a)**  
 41 ~11 mg/mL biofilm solved in CDCl<sub>3</sub>/FA 3:2. **b)** ~16 mg/mL biofilm solved in CDCl<sub>3</sub>. **c)** ~14 mg/mL biofilm solved  
 42 in DMSO-d<sub>6</sub>. **Aquatic biofilm, i.e. a complex and dynamic community of algae, cyanobacteria, heterotrophic**  
 43 **microorganisms, and detritus attached to surfaces in most aquatic exosystems. Biofilm samples were collected at**  
 44 **the river Moselle (position 50° 21' 49.8" N 7° 33' 54.6" E) by brushing light-exposed grown surfaces of submerges**  
 45 **stones and and dried at 60° C.)**

46

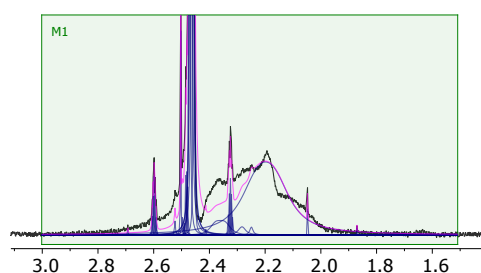

47

48 **Figure SI 2** <sup>1</sup>H-NMR spectrum of PVC after line fitting for the PF-method in the range of 3.0-1.5 ppm. Blue  
 49 represent the fitted peaks and pink represent the sum of the fitted peaks.

**Comment [NP]:** To Referee 2 Suggestion 2

We here refer to aquatic biofilm (i.e. stream periphyton) which is a complex and dynamic community of algae, cyanobacteria, heterotrophic microorganisms, and detritus. Under natural conditions, bacteria generally exist in the biofilm state, i.e. cells attached to each other and also to a surface, embedded in a protective matrix. In aquatic ecosystems aquatic biofilm represents an important food source for grazing macroinvertebrates or fish habitats and can adsorb contaminants from the free-flowing water.

Analyzed biofilm samples were taken from natural biofilm of the river Moselle (at position 50° 21' 49.8" N 7° 33' 54.6" E) by brushing grown surfaces (i.e. stones), as it not commercially available.

Relevant information on the general composition of biofilm and the collection site was added to the caption of figure SI 2.

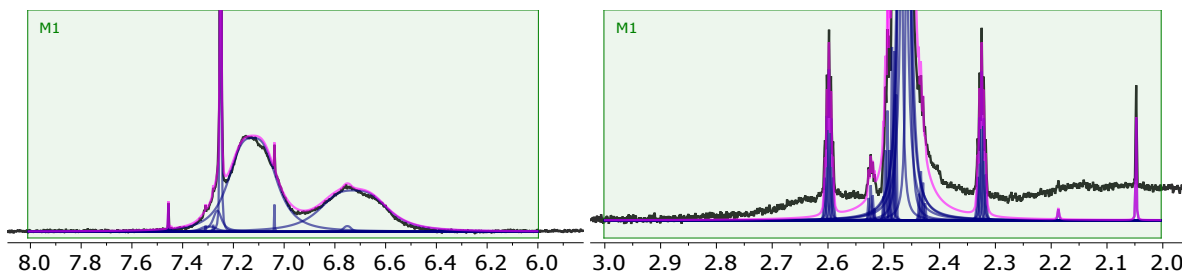

50

51 **Figure SI 3**  $^1\text{H-NMR}$  spectra of ABS in  $\text{CDCl}_3$  (left) and in  $\text{DMSO-d}_6$  (right) after line fitting for the PF-method  
 52 in the range of 8.0-6.0 ppm and 3.0-2.0 ppm. Blue represent the fitted peaks and pink represent the sum of the  
 53 fitted peaks.

54

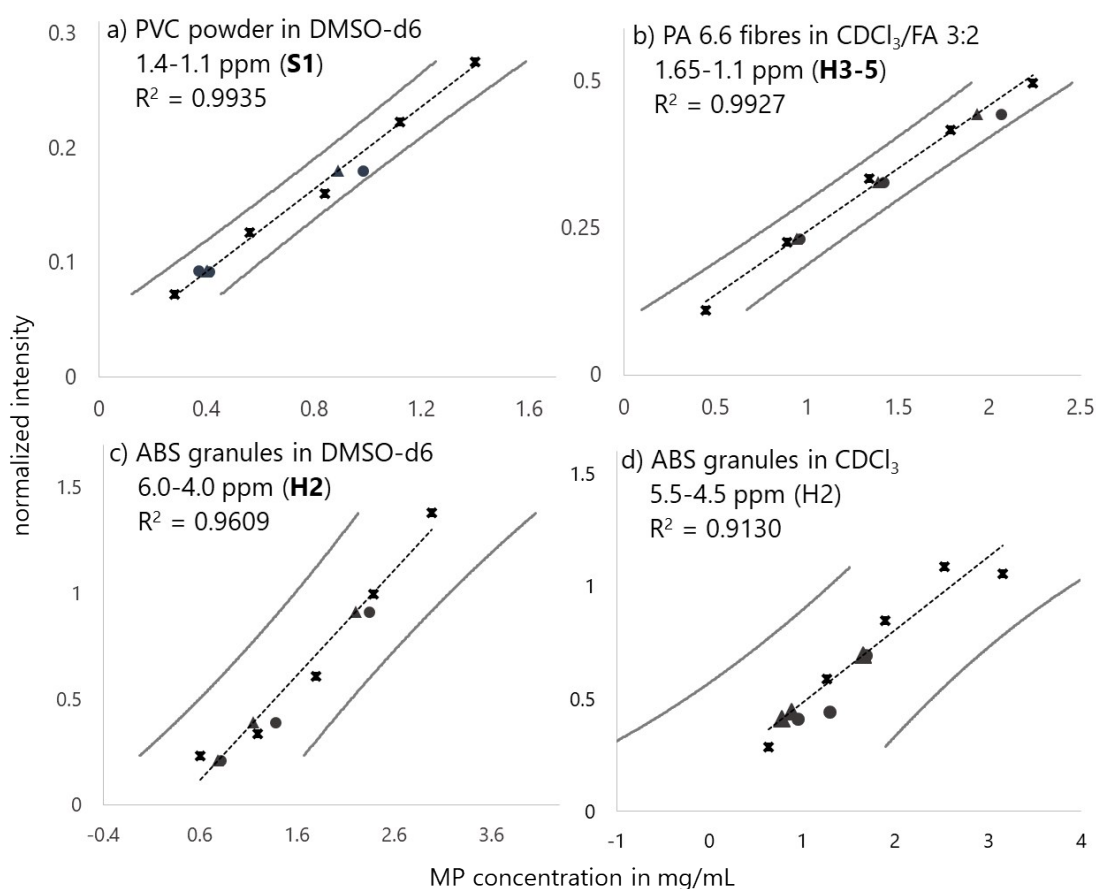

55

56 **Figure SI 4.** Calibration curves for the signal which can also be used for quantification for the MP particles of  
 57 PVC, ABS and PA with the appropriate confidence interval (CI). Plotted is the MP concentration in mg/mL against  
 58 the normalized intensity. In addition, the true and calculated values of the model samples are given. a) signal  
 59 range of 1.4-1.1 ppm (S1) for PVC particles, b) signal range of 1.65-1.1 ppm (H3-5) for PA fibres, c) signal range  
 60 of 6.0-4.0 ppm (H2) for ABS particles in  $\text{DMSO-d}_6$  and d) signal range of 5.5-4.5 ppm (H2) for ABS particles in  
 61  $\text{CDCl}_3$  are compared. For linearity data see supporting information SI 6.

62

63

64

65 **Table SI 2.** Linearity data of MP particles (PVC, ABS and PA). Data were calculated from five measurement  
66 points. PVC: Integration area 4.7-4.05 ppm (H1) and 1.4-1.1 ppm (S1). For integration the peak-fitting method  
67 was used. 0.28-1.40 mg/mL concentration range. ABS in CDCl<sub>3</sub>: Integration area 7.1-6.0 ppm (H1) and 5.5-4.5  
68 ppm (H2) are given. For integration the peak-fitting method was used. 0.63-3.15 mg/mL concentration range. ABS  
69 in DMSO-d<sub>6</sub>: Integration area 7.5-6.0 ppm (H1) and 6.0-4.0 ppm (H2) are given. For integration the peak-fitting  
70 method was used. 0.63-3.15 mg/mL concentration range. PA: Integration area 3.2-3.05 ppm (H1) and 1.65-1.1  
71 ppm (H3-5) are given. For integration the peak-fitting method was used. 0.45-2.24 mg/mL concentration range.

|             | MP particles                | Slope ± SD      | Intercept ± SD    | R <sup>2</sup> |
|-------------|-----------------------------|-----------------|-------------------|----------------|
| Signal H1   | PVC in DMSO-d <sub>6</sub>  | 1.3487 ± 0.0330 | - 0.0455 ± 0.0306 | 0.9982         |
| Signal H1   | ABS in CDCl <sub>3</sub>    | 3.8863 ± 0.2247 | + 0.6164 ± 0.4699 | 0.9901         |
| Signal H1   | ABS in DMSO-d <sub>6</sub>  | 3.8158 ± 0.0312 | + 0.0832 ± 0.0617 | 0.9998         |
| Signal H1   | PA in CDCl <sub>3</sub> /FA | 0.0714 ± 0.0029 | + 0.0106 ± 0.0043 | 0.9950         |
| Signal S1   | PVC in DMSO-d <sub>6</sub>  | 0.1797 ± 0.0084 | + 0.0204 ± 0.0078 | 0.9935         |
| Signal H2   | ABS in CDCl <sub>3</sub>    | 0.3235 ± 0.0577 | + 0.1609 ± 0.1206 | 0.9130         |
| Signal H2   | ABS in DMSO-d <sub>6</sub>  | 0.4960 ± 0.0578 | - 0.1774 ± 0.1143 | 0.9609         |
| Signal H3-5 | PA in CDCl <sub>3</sub> /FA | 0.2156 ± 0.0107 | + 0.0281 ± 0.0158 | 0.9927         |

72

73 **Table SI 3.** Quantitative results for model samples using the signal which can also be used for quantification for  
74 the MP particles of PVC, ABS and PA. True Value ± weighting error and calculated values ± confidence interval  
75 (CI) of the respective MP samples in mg/mL as well as the accuracy (bias in %) and precision (RSP in %) are  
76 given. PVC samples: integration area 1.4-1.1 ppm (S1). For integration the PF-method was used. ABS samples in  
77 DMSO-d<sub>6</sub>: integration area 6.0-4.0 ppm (H2). For integration the PF-method was used. ABS samples in CDCl<sub>3</sub>:  
78 integration area 5.5-4.55 ppm (H2). For integration the PF-method was used. PA samples: integration area 1.65-  
79 1.1 ppm (H3-5). For integration the INT-method was used.

|                                     | MP signal | True Value ± Δx (mg/mL) | Calculated ± CI (mg/mL) | Accuracy (bias in %) | Precision (RSD in %) |
|-------------------------------------|-----------|-------------------------|-------------------------|----------------------|----------------------|
| PVC 1 (in DMSO-d <sub>6</sub> )     | S1        | 0.98 ± 0.01             | 0.94 ± 0.13             | 95.5                 | 99.9                 |
| PVC 2 (in DMSO-d <sub>6</sub> )     | S1        | 0.78 ± 0.01             | 0.68 ± 0.13             | 87.2                 | 99.9                 |
| PVC 3 (in DMSO-d <sub>6</sub> )     | S1        | 0.41 ± 0.01             | 0.44 ± 0.14             | 107                  | 99.9                 |
| ABS 1 (in DMSO-d <sub>6</sub> )     | H2        | 2.34 ± 0.01             | 2.18 ± 0.78             | 93.0                 | 99.2                 |
| ABS 2 (in DMSO-d <sub>6</sub> )     | H2        | 1.37 ± 0.01             | 1.15 ± 0.80             | 84.3                 | 99.2                 |
| ABS 3 (in DMSO-d <sub>6</sub> )     | H2        | 0.81 ± 0.01             | 0.78 ± 0.85             | 95.9                 | 99.8                 |
| ABS 1 (in CDCl <sub>3</sub> )       | H2        | 1.68 ± 0.01             | 1.70 ± 1.25             | 101                  | 99.9                 |
| ABS 2 (in CDCl <sub>3</sub> )       | H2        | 1.29 ± 0.01             | 0.88 ± 1.37             | 68.1                 | 99.9                 |
| ABS 3 (in CDCl <sub>3</sub> )       | H2        | 0.95 ± 0.01             | 0.70 ± 1.39             | 73.4                 | 92.2                 |
| PA 1 (in CDCl <sub>3</sub> /FA 3:2) | H3-5      | 2.06 ± 0.01             | 1.94 ± 0.26             | 94.1                 | 99.2                 |
| PA 2 (in CDCl <sub>3</sub> /FA 3:2) | H3-5      | 1.42 ± 0.01             | 1.39 ± 0.24             | 97.9                 | 99.9                 |
| PA 3 (in CDCl <sub>3</sub> /FA 3:2) | H3-5      | 0.96 ± 0.01             | 0.95 ± 0.25             | 98.6                 | 99.9                 |

81 **Table SI 4.** Overview of the  $^1\text{H}$ -Signals of the MP polymer types, residual solvent signals and matrix effects of biofilm in the corresponding solvent conditions. Indicated  
 82 are the  $^1\text{H}$ -signals or the range of the chemical shift in ppm, whether the MP signals is suitable for quantitative analysis by qNMR and the reasons why the corresponding

|                            |         | Signals [ppm]                | Suitable qNMR                                                   | Reasons why not suitable for quantification                                   |
|----------------------------|---------|------------------------------|-----------------------------------------------------------------|-------------------------------------------------------------------------------|
| <b>DMSO-d6</b>             | solvent | 2.47-2.4 (DMSO)              |                                                                 |                                                                               |
|                            |         | 3.36-3.24 (H <sub>2</sub> O) |                                                                 |                                                                               |
|                            | matrix  | 2.3-1.9; 1.5-0.6             |                                                                 |                                                                               |
|                            | PVC     | 4.6-4.2 (H1)                 | yes                                                             | -                                                                             |
|                            |         | 2.5-2.1 (H2)                 | no                                                              | Signal overlap with solvent signal, interference with matrix effects possible |
|                            |         | 1.4-1.1 (S1)                 | (yes)                                                           | interference with matrix effects possible                                     |
|                            |         | 0.9-0.7 (S2)                 | no                                                              | interference with matrix effects possible, low signal intensity               |
|                            | ABS     | 7.7-6.5 (H1)                 | yes                                                             | -                                                                             |
|                            |         | 5.9-4.5 (H2)                 | (yes)                                                           | Low signal intensity                                                          |
|                            |         | 2.7-1.2 (H3-H7)              | no                                                              | Signal overlap with solvent signal, Interference with matrix effects possible |
| 0.9-0.7 (H8)               |         | no                           | Interference with matrix effects possible, low signal intensity |                                                                               |
| <b>CDCl<sub>3</sub></b>    | solvent | 7.25 (CDCl <sub>3</sub> )    |                                                                 |                                                                               |
|                            | matrix  | 1.6-0.6                      |                                                                 |                                                                               |
|                            | ABS     | 7.4-6.3 (H1)                 | (yes)                                                           | Signal overlap with solvent signal                                            |
|                            |         | 5.8-4.7 (H2)                 | (yes)                                                           | low signal intensity                                                          |
|                            |         | 3.0-1.0 (H3-H7)              | (yes)                                                           | Interference with matrix effects possible                                     |
|                            |         | 0.9-0.7 (H8)                 | no                                                              | Interference with matrix effects possible, low signal intensity               |
| <b>CDCl<sub>3</sub>/FA</b> | solvent | 7.25 (CDCl <sub>3</sub> )    |                                                                 |                                                                               |
|                            | Matrix  | 1.4-0.6                      |                                                                 |                                                                               |
|                            | PA 6.6  | 3.2-3.0 (H1)                 | yes                                                             | -                                                                             |
|                            |         | 2.3-2.15 (H2)                | (yes)                                                           | interference with matrix effects possible                                     |
|                            |         | 1.65-1.1 (H3-H5)             | (yes)                                                           | interference with matrix effects possible                                     |
|                            |         | 7.31 (amines)                | (yes)                                                           | low signal intensity                                                          |

83 *signal is not suitable.*
